# Supplementary material for: CNTF Prevents Development of Outer Retinal Neovascularization Through Upregulation of CxCl10
Source: PubMed Central journal article supplement — Invest Ophthalmol Vis Sci. 2020 Aug 11;61(10):20. doi: 10.1167/iovs.61.10.20 (PMC7441336; doi:10.1167/iovs.61.10.20), 2020-08-11
Supplement: iovs-61-10-20_s001.pdf [file iovs-61-10-20_s001.pdf]

| Array Spot | Analyte                   | Abbreviation               |
|------------|---------------------------|----------------------------|
| A1/2       | Reference Spots           |                            |
| A5/6       | ADAMTS1                   | METH1                      |
| A7/8       | Amphiregulin              | AR                         |
| A9/10      | Angiogenin                | ANG                        |
| A11/12     | Angiopoietin-1            | Ang-1                      |
| A13/14     | Angiopoietin-3            | Ang-3                      |
| A15/16     | Coagulation Factor        | Tissue Factor, TF          |
| A17/18     | CXCL16                    | -                          |
| A21/22     | Reference Spots           |                            |
| B3/4       | Cyr61                     | CCN1,                      |
| B5/6       | DLL4                      | -                          |
| B7/8       | DPPIV                     | CD26                       |
| B9/10      | EGF                       | -                          |
| B11/12     | Endoglin                  | CD105                      |
| B13/14     | Endostatin/Collagen XVIII | -                          |
| B15/16     | Endothelin-1              | ET-1                       |
| B17/18     | FGF acidic                | FGF-1, ECGF, HBGF-1        |
| B19/20     | FGF basic                 | FGF-2                      |
| C3/4       | KGF                       | FGF-7                      |
| C5/6       | Fractalkine               | CX3CL1                     |
| C7/8       | GM-CSF                    | -                          |
| C9/10      | HB-EGF                    | -                          |
| C11/12     | HGF                       | HepatopoietinA             |
| C13/14     | IGFBP-1                   | -                          |
| C15/16     | IGFBP-2                   | -                          |
| C17/18     | IGFBP-3                   | -                          |
| C19/20     | IL-1 $\alpha$             | IL-1F1                     |
| C21/22     | IL-1 $\beta$              | IL-1F2                     |
| D3/4       | IL-10                     | CSIF                       |
| D5/6       | IP-10                     | CXCL10, CRG-2              |
| D7/8       | KC                        | CXCL1, CINC-1,GRO $\alpha$ |
| D9/10      | Leptin                    | OB                         |
| D11/12     | MCP-1                     | CCL2/JE                    |
| D13/14     | MIP-1 $\alpha$            | CCL3                       |
| D15/16     | MMP-3                     | -                          |
| D17/18     | MMP-8                     | -                          |
| D19/20     | MMP-9                     | -                          |
| D21/22     | NOV                       | CCN3, IGFBP-9              |

| Array Spot | Analyte           | Abbreviation |
|------------|-------------------|--------------|
| E3/4       | Osteopontin       | OPN          |
| E5/6       | PD-ECGF           | -            |
| E7/8       | PDGF-AA           | -            |
| E9/10      | PDGF-AB/PDGF-BB   | -            |
| E11/12     | Pentraxin-3       | PTX-3,TSG-14 |
| E13/14     | Platelet Factor 4 | CXCL4,PF4    |
| E15/16     | PIGF-2            | -            |
| E17/18     | Prolactin         | PRL          |
| E19/20     | Proliferin        | -            |
| E21/22     | Reference         | -            |
| F3/3       | SDF-1             | CXCL12       |
| F5/6       | Serpin E1         | PAI-1        |
| F7/8       | Serpin F1         | PEDF         |
| F8/10      | Thrombospondin-2  | TSP-2        |
| F11/12     | TIMP-1            | -            |
| F13/14     | TIMP-4            | -            |
| F15/16     | VEGF              | VPF          |
| F17/18     | VEGF-B            | VRF          |
| F19/20     | Negative          |              |

**Supplemental Table 1: Analyte Index of the Mouse Angiogenesis Proteome Profiler.**
