# Supplementary material for: CNTF Prevents Development of Outer Retinal Neovascularization Through Upregulation of CxCl10
Source: PubMed Central journal article supplement — Invest Ophthalmol Vis Sci. 2020 Aug 11;61(10):20. doi: 10.1167/iovs.61.10.20 (PMC7441336; doi:10.1167/iovs.61.10.20), 2020-08-11
Supplement: iovs-61-10-20_s002.pdf [file iovs-61-10-20_s002.pdf]

Figure S1

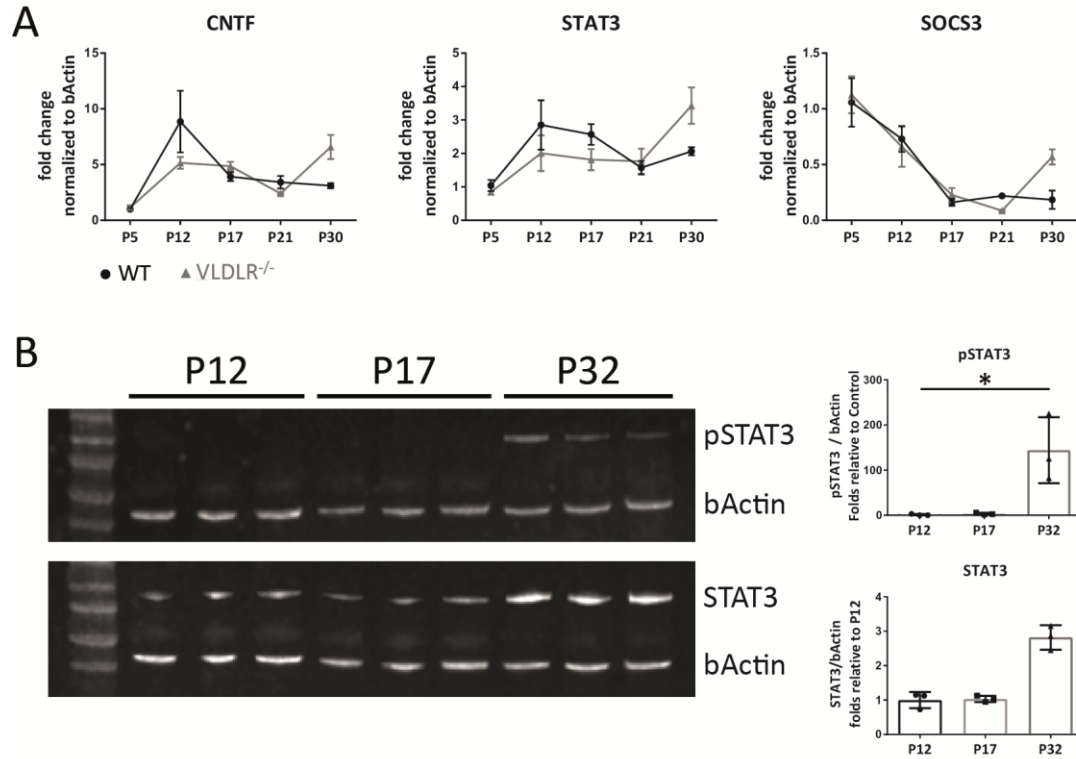

**Supplemental Figure S1. Endogenous regulation of CNTF/STAT3 signaling during retinal maturation in the VLDLR<sup>-/-</sup> model.** (A) mRNA expression levels of CNTF, STAT3, and SOCS3 at multiple time points during retinal development normalized to P5. N=4 mice per group and time-point. (B) Western blot analysis of STAT3 and pSTAT3 levels at P12, P17 and P32. Each column represents a biological replicate. N = 3 mice per group and time-point. Kruskal-Wallis Test with Dunn's multiple comparisons test, \* p<0.05.
