# Supplementary material for: CNTF Prevents Development of Outer Retinal Neovascularization Through Upregulation of CxCl10
Source: PubMed Central journal article supplement — Invest Ophthalmol Vis Sci. 2020 Aug 11;61(10):20. doi: 10.1167/iovs.61.10.20 (PMC7441336; doi:10.1167/iovs.61.10.20), 2020-08-11
Supplement: iovs-61-10-20_s003.pdf [file iovs-61-10-20_s003.pdf]

## Figure S2

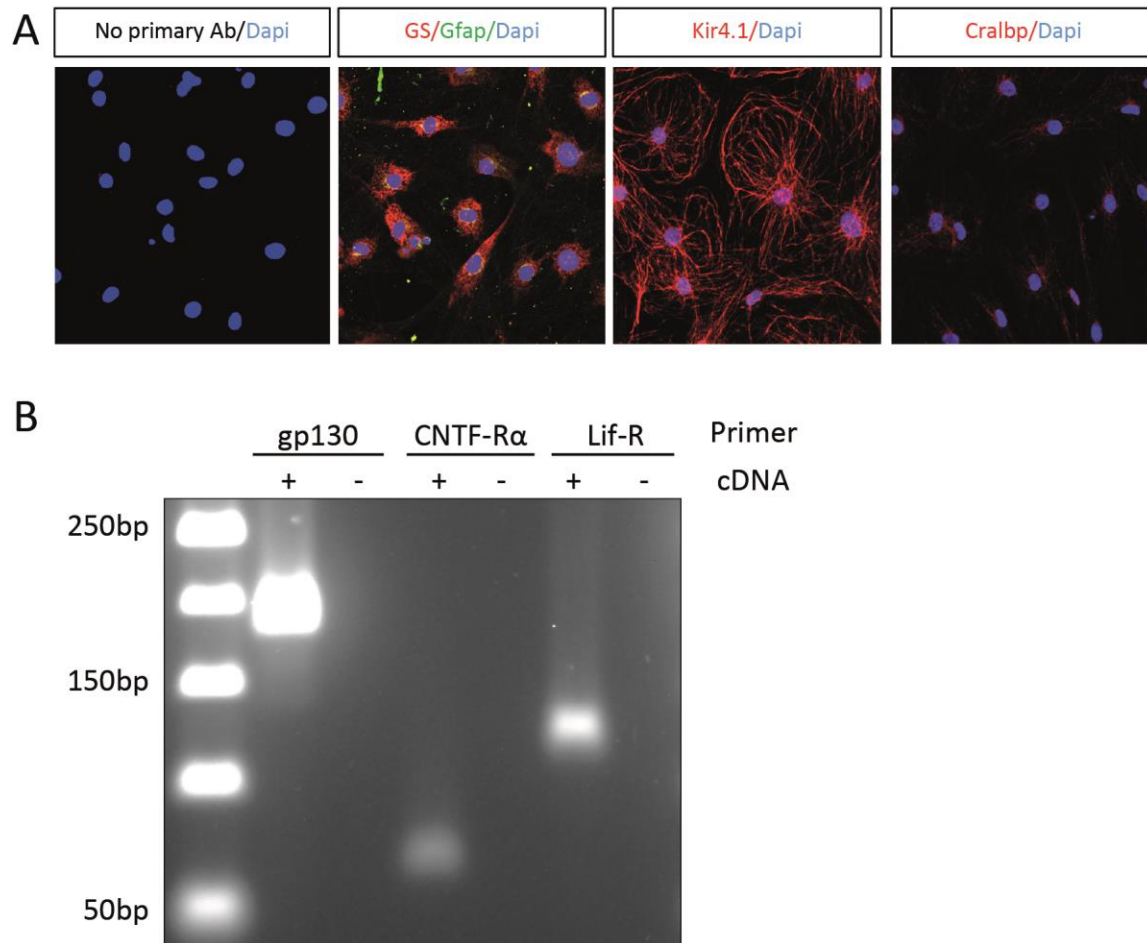

**Supplemental Figure S2. Characterization of the primary Müller cell culture.** (A) Representative immunohistochemical staining of primary Müller cells with Müller cell-specific markers Kir 4.1, GS, and Cralbp. (B) PCR analysis on primary murine Müller cell lysates for CNTF-R $\alpha$ , gp130 and LifR expression.
